# Supplementary material for: SsCak1 Regulates Growth and Pathogenicity in Sclerotinia sclerotiorum
Source: MDPI journal article supplement (doi:10.3390/ijms241612610), 2023-08-09
Supplement: s1 [file s1]

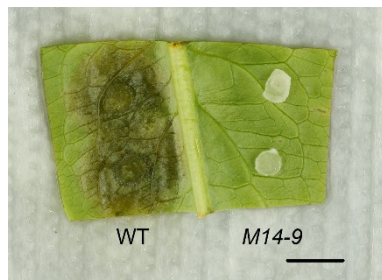

Figure S1: Identification of a pathogenicity-deficient mutant M14-9 by screening on lettuce leaves.

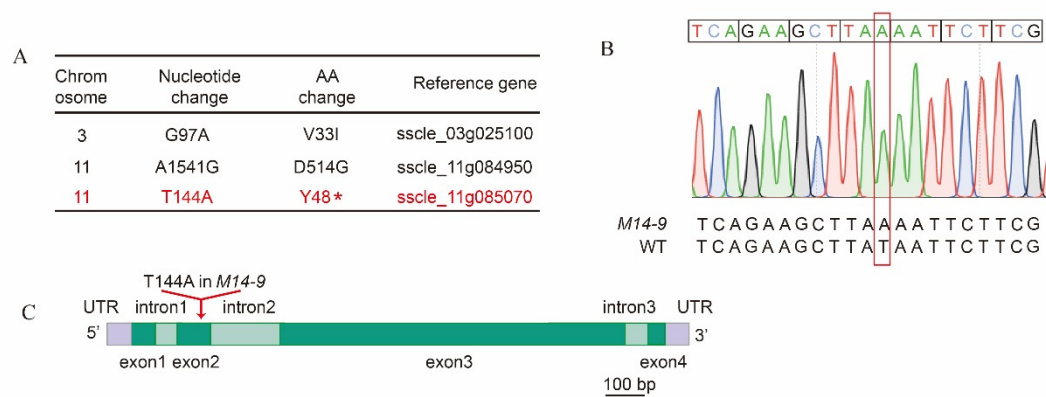

Figure S2: Identification of the molecular lesions of the M14-9 mutants.

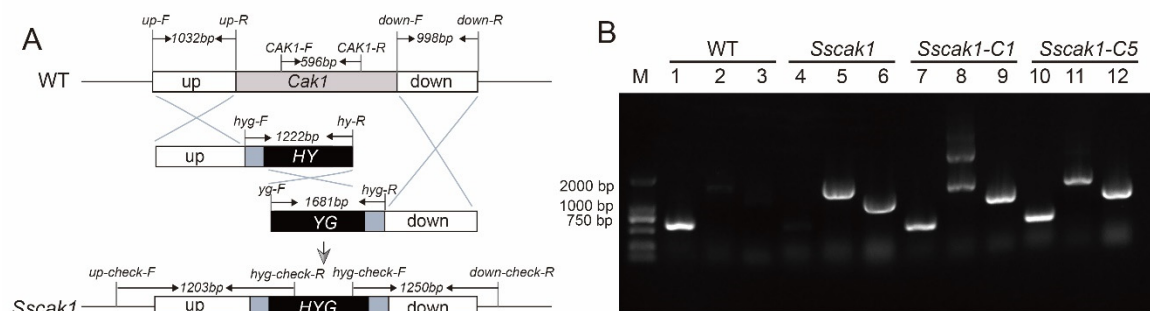

Figure S3: Identification of Sscak1 by PCR.

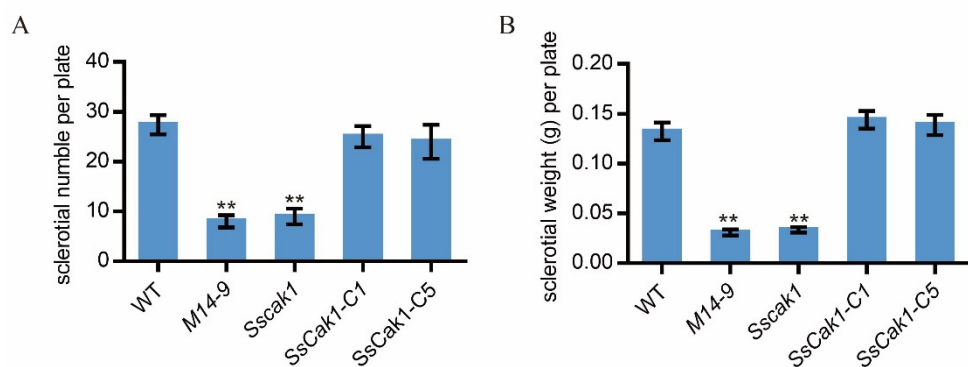

Figure S4: Sclerotia number and weight of SsCak1 knockout and complementation strains.

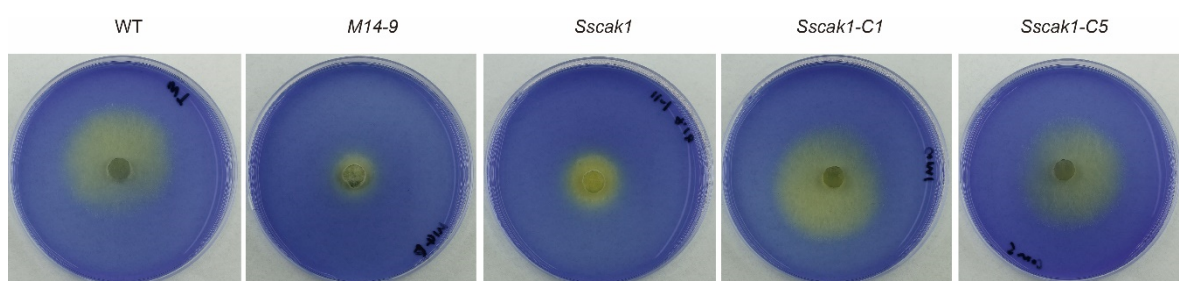

Figure S5: WT, M14-9, Sscak1, SsCak1-C1 and SsCak1-C5 grown on PDA medium containing bromophenol blue. Experiments were conducted three times with similar results.

Supplementary Table S1 Primer sequences used in this study.

|             |                                                |
|-------------|------------------------------------------------|
| up-F        | tatgaccatgattacgaattc TCTGCGACCGAAGGATTACT     |
| up-R        | ccttcaatatcatcttct ATTGTCTGAACCAAGAGGAT        |
| down-F      | tagaggaatccttctt CCAGGTCAAGTAATGTGTCT          |
| down-R      | tctagaggatccccgggtacc TTACGAATGTGTGGAGGTT      |
| hyg-F       | TGACTGGAGCGAGGCGATGT                           |
| hy-R        | tctagaggatccccgggtaccGCATCATCGAAATTGCCGTCAACC  |
| yg-F        | tatgaccatgattacgaattcTCTCGGAGGGCGAAGAATCTCGTGC |
| hyg-R       | AAAGAAGGATTACCTCTAAACAAGTGT                    |
| up-check-F  | TTCATTGTTGACCTCCACTA                           |
| hyg-check-R | TACAGGACACACATTCATCG                           |

|              |                                             |
|--------------|---------------------------------------------|
| hyg-check-F  | TTATCCTCTTCACACGCTCG                        |
| down-check-R | TCTCCTTCTACATCCGCATC                        |
| CAK1-F       | GAGATTGGTCTTGCTGTTGC                        |
| CAK1-R       | CAGCATCTGGAAGTAACTCT                        |
| Cak1-RT-F    | GCTACCTACGATGATTTATGC                       |
| Cak1-RT-R    | ATTATGGAAGGATGCGAGAG                        |
| Sstub1-RT-F  | GTGAGGCTGAGGGCTGTGTGA                       |
| Sstub1-RT-R  | CCTTTGGCGATGGGACG                           |
| TRV-Cak1-F   | gtgagtaagggtaccgaattcATGGACTCCACAACAGACTG   |
| TRV-Cak1-R   | gagacgcgtgagctcggtaccAACAGCGCCGCTAGAGATAT   |
| TRV-PDS-F    | gtgagtaagggtaccgaattcGAACATATTGAGTCAAAAGGTG |
| TRV-PDS-R    | gagacgcgtgagctcggtaccGCTTCTGCTGAAGAGCAGAT   |
| TRV-GFP-F    | gtgagtaagggtaccgaattcTGGTGAGCAAGGGCGAGGAG   |
| TRV-GFP-R    | gagacgcgtgagctcggtaccTGGACGTAGCCTTCGGGCAT   |
